# Supplementary material for: Global cross-sectional survey of women with vasomotor symptoms associated with menopause: prevalence and quality of life burden
Source: PubMed Central journal article supplement — Menopause. 2021 May 24;28(8):875–82. doi: 10.1097/GME.0000000000001793 (PMC8746897; doi:10.1097/gme.0000000000001793), 2021-05-24
Supplement: menop-28-875-s002.pdf [file menop-28-875-s002.pdf]

Women invited to participate in screening survey<sup>a</sup>  
N = 69,000

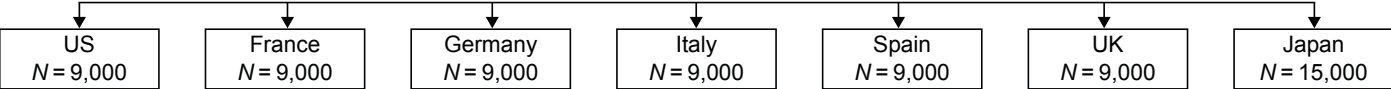

Sent the screening survey

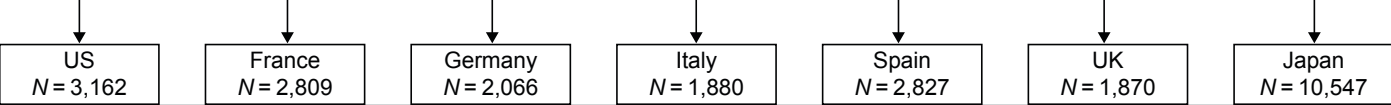

Completed the screening survey

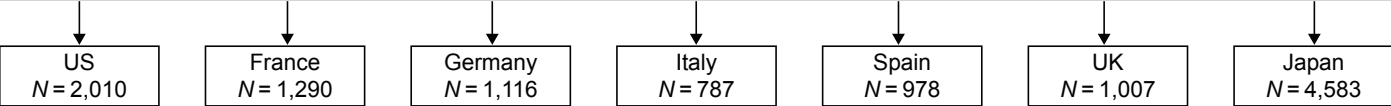

Postmenopausal women

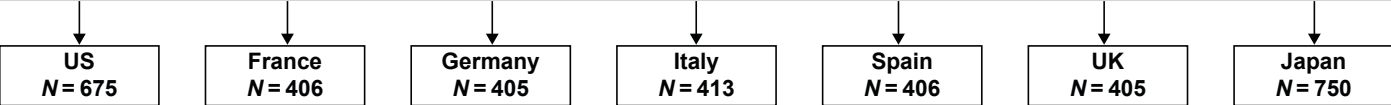

Met the inclusion/exclusion criteria and completed the full survey

<sup>a</sup>Women aged 40-65 years from consumers panels
