# Supplementary figures and images for: Global cross-sectional survey of women with vasomotor symptoms associated with menopause: prevalence and quality of life burden
Source: PubMed Central journal article supplement — Menopause. 2021 May 24;28(8):875–82. doi: 10.1097/GME.0000000000001793 (PMC8746897; doi:10.1097/gme.0000000000001793), 2021-05-24

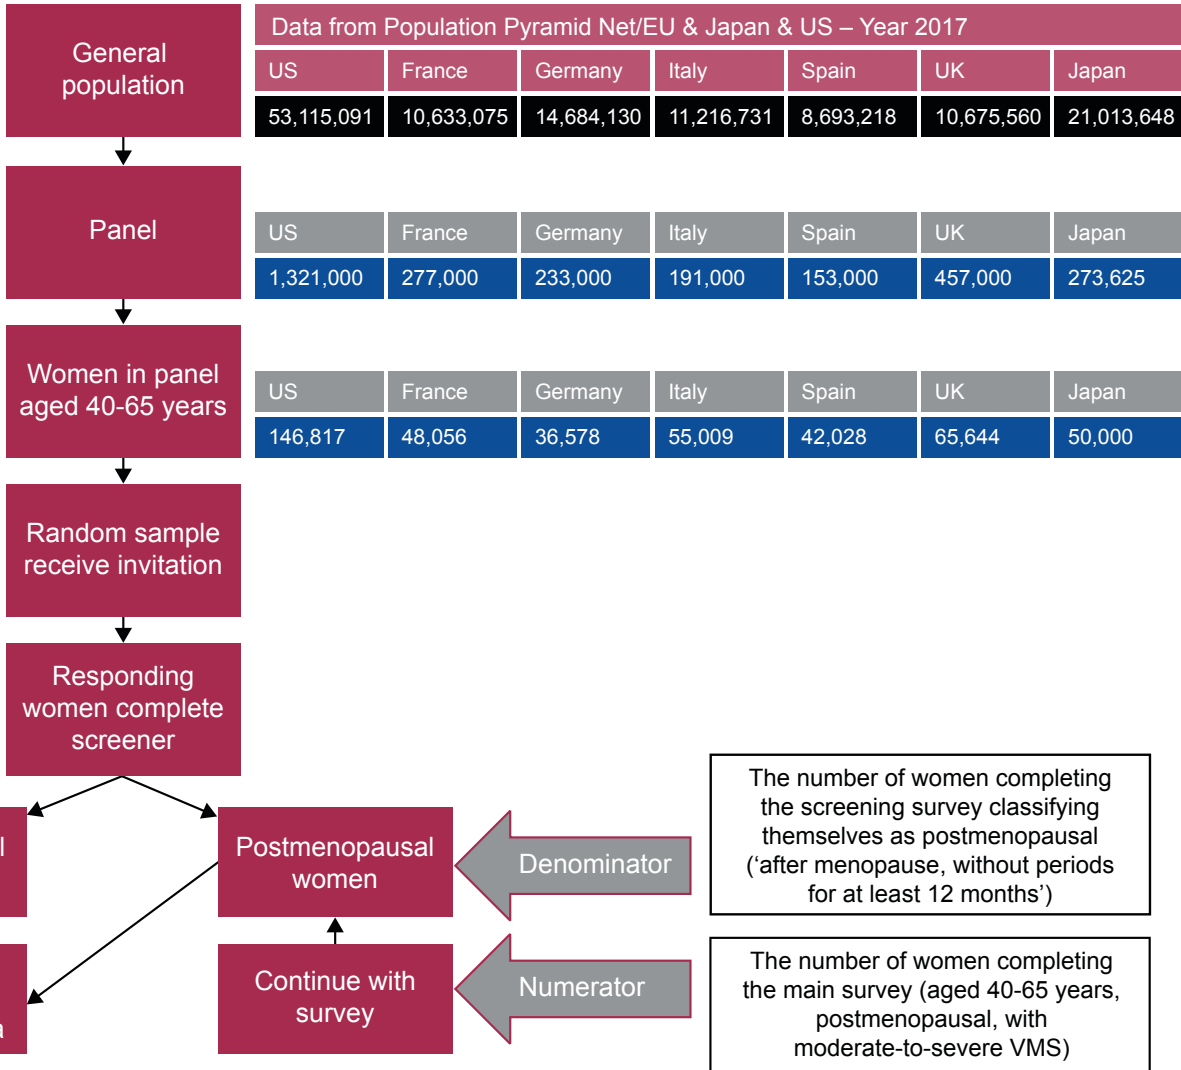

Supplement: menop-28-875-s001.pdf [file menop-28-875-s001.pdf]
